# Supplementary material for: Transcriptome analysis of extant cotton progenitors revealed tetraploidization and identified genome-specific single nucleotide polymorphism in diploid and allotetraploid cotton
Source: PubMed Central journal article supplement (PMC4267057; doi:10.1186/1756-0500-7-493), 2014-08-06
Supplement: 13104_2014_3038_MOESM5_ESM.pdf [file 13104_2014_3038_MOESM5_ESM.pdf]

# Supplementary Figure 1

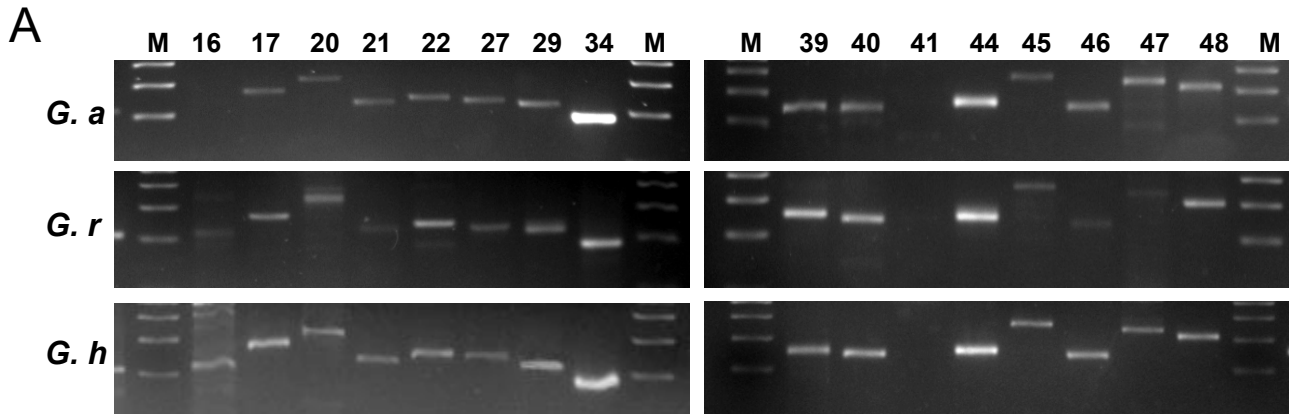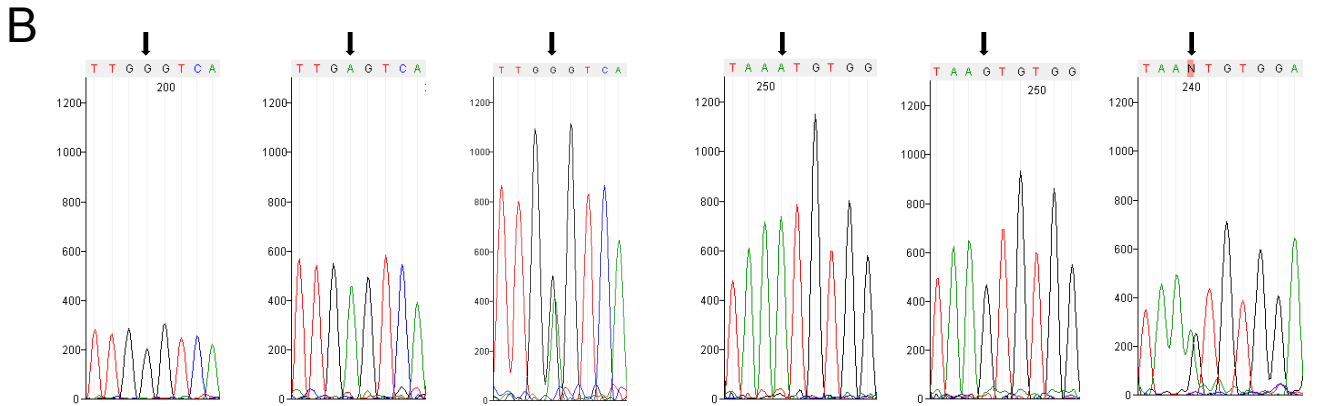

|      |                    |                    |                    |      |                    |                    |                    |
|------|--------------------|--------------------|--------------------|------|--------------------|--------------------|--------------------|
| Exp# |                    |                    |                    | Exp# |                    |                    |                    |
| 22   | cuDContig11665     | cuAContig4409      |                    | 48   | CDcontig15250      | cuAContig1068      |                    |
|      | <i>G. arboreum</i> | <i>G. romandii</i> | <i>G. hirsutum</i> |      | <i>G. arboreum</i> | <i>G. romandii</i> | <i>G. hirsutum</i> |

## Supplementary Figure 1: GNP validation.

(A) The PCR amplicon with potential DNA polymorphism from genomic DNA from *G. arboreum* (A2), *G. raimondii* (D5) and *G. hirsutum* (AADD). The code is according to the experiment # in table S3. (B) Two examples for validated SNP sites in TM-1 genomic DNA. The arrow indicates the SNP site show single peak in diploid sequence and double peak in allotetraploid.
